# Supplementary material
Source: PubMed Central journal article supplement (PMC3340278)
Supplement: supp_M111.246785_jbc.M111.246785-1.pdf [file supp_M111.246785_jbc.M111.246785-1.pdf]

Supplementary Tables:

Table S1: Antibodies used for Western blot analysis or immunoprecipitations:

| Protein                                   | Source                    |
|-------------------------------------------|---------------------------|
| Acetylated histone H3                     | Millipore                 |
| Akt                                       | Cell Signaling            |
| Cleaved Caspase-3                         | Cell Signaling Technology |
| Enolase                                   | Santa Cruz                |
| HA                                        | Millipore                 |
| Mouse anti-STAT1 $\alpha$ (IP or Western) | Santa Cruz Biotechnology  |
| mTOR                                      | Millipore                 |
| NPI-1 (KPNA1)                             | Zymed                     |
| p70 S6 kinase                             | Cell Signaling Technology |
| Phospho-Akt S473                          | Cell Signaling            |
| phospho-p70 S6 kinase T389                | Cell Signaling Technology |
| phospho-S6 S235/S236                      | Cell Signaling Technology |
| Phospho-serine/threonine                  | Cell Signaling            |
| PP2Ac                                     | Cell Signaling Technology |
| Rabbit anti-STAT1 (Western or IF)         | Santa Cruz Biotechnology  |
| Raptor                                    | Cell Signaling Technology |
| Rictor                                    | Cell Signaling Technology |
| S6                                        | Cell Signaling Technology |
| V5                                        | Invitrogen                |
| $\beta$ -actin                            | Sigma                     |

Table S2: Oligonucleotide primers (5'-3') for Sybr Green-based Real-time PCR:

Human:

| Transcript | Forward Primer         | Reverse Primer       |
|------------|------------------------|----------------------|
| STAT1      | tccatccttgggtacaacatgc | cagagagggagcaggtgttt |
| S6K        | agcacagcaaatcctcagac   | tcattgtcacatccatctgc |
| KPNA1      | caaatctctgaatcccgatg   | ttctccgcttgaataactgc |
| mTOR       | gccatccagattgatacctg   | tgtctgtgagaagctggtga |
| Akt        | gaagagatggaggtgtccct   | atctcatggcgtagtagcg  |
| GAPDH      | aagaaggtggtgaagcaggcg  | accaggaatgagcttgacaa |

Mouse:

| Transcript | Forward Primer       | Reverse Primer        |
|------------|----------------------|-----------------------|
| STAT1      | cttgtgtgaatcccgaacc  | agctcgaaccactgtgacatc |
| KPNA1      | cgtctccctctctcgtagtg | cttcttctccctcctcctg   |
| GAPDH      | accacagtccatgccatcac | tccaccacctgttctgta    |

Table S3: Oligonucleotide primers (5'-3') for STAT1 site-directed mutagenesis:

| Mutation    | Forward Primer                | Reverse Primer                | Template       |
|-------------|-------------------------------|-------------------------------|----------------|
| STAT1 Y701F | ggtaccggattcatcaagactgagttg   | caactcagtcttgatgaatccgtacc    | pDONR221-STAT1 |
| STAT1 S727A | ctcccatggcccctgaggagttg       | caaactcctcagggccatggggag      | pDONR221-STAT1 |
| STAT1 L407A | gggaccgcaccttcgctctttccagcagc | gctgctggaaaagagcgaagtgcggtccc | pDONR221-STAT1 |
