# Supplementary material
Source: PubMed Central journal article supplement (PMC3340278)
Supplement: supp_M111.246785_jbc.M111.246785-4.pdf [file supp_M111.246785_jbc.M111.246785-4.pdf]

Supplementary Figure 3: Effect of Glucose or Serum Deprivation on mTOR activity in A549 Cells:

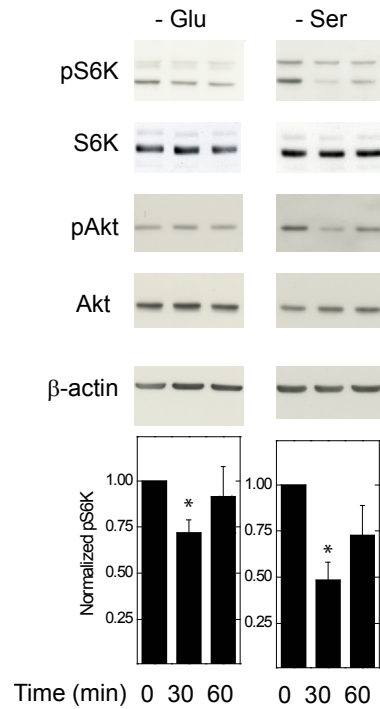

Supplementary Figure 3: A549 cells were exposed to glucose-free (left) or serum-free (right) media for 0, 30, or 60 min before preparation of whole cell lysates and detection of the indicated proteins by Western blot analysis. Data below are means of fold change in pS6K integrated band pixel density (Time 0 controls = 1) from 4 individual experiments. \*  $p < 0.05$  vs. control by Student's t-test.
